# Supplementary material for: Impact of Varicocele on Testicular Oxidative Stress and Sperm Parameters in Experimental Animals: A Systematic Review and Meta-Analysis
Source: PubMed Central journal article supplement — World J Mens Health. 2024 Feb 7;42(3):563–73. doi: 10.5534/wjmh.230260 (PMC11216963; doi:10.5534/wjmh.230260), 2024-02-07
Supplement: wjmh-42-563-s001.pdf [file wjmh-42-563-s001.pdf]

**Supplement Table 1.** PECOS (Population, Exposure, Comparator, Outcomes, Study design) of this systematic review

| Category   | Description                                                                                                                                                                                                                                                                                                                                                                                                                |
|------------|----------------------------------------------------------------------------------------------------------------------------------------------------------------------------------------------------------------------------------------------------------------------------------------------------------------------------------------------------------------------------------------------------------------------------|
| Population | Animal with varicocele                                                                                                                                                                                                                                                                                                                                                                                                     |
| Exposure   | Varicocele                                                                                                                                                                                                                                                                                                                                                                                                                 |
| Comparator | Animal without varicocele                                                                                                                                                                                                                                                                                                                                                                                                  |
| Outcomes   | Primary outcome<br>• Values of oxidative and heat stress markers (ROS), total antioxidant capacity (TAC), Malondialdehyde (MDA), sperm DNA fragmentation in animal with varicocele compared to animal without.<br>Secondary outcome<br>• Conventional semen parameters (semen volume [mL], sperm concentration [ $\times 10^6$ /mL], total sperm motility [%], progressive sperm motility [%] and normal sperm forms [%]). |

ROS: reactive oxygen species.
