# Supplementary material for: Impact of Varicocele on Testicular Oxidative Stress and Sperm Parameters in Experimental Animals: A Systematic Review and Meta-Analysis
Source: PubMed Central journal article supplement — World J Mens Health. 2024 Feb 7;42(3):563–73. doi: 10.5534/wjmh.230260 (PMC11216963; doi:10.5534/wjmh.230260), 2024-02-07

| Study                       | Experimental |      |      | Control   |      |      | MD [95% CI]              |
|-----------------------------|--------------|------|------|-----------|------|------|--------------------------|
|                             | Total        | Mean | SD   | Total     | Mean | SD   |                          |
| Sadeghi et al 2020          | 10           | 0.78 | 0.15 | 10        | 0.22 | 0.08 | 0.56 [0.45; 0.67]        |
| Khosravanian et al 2014     | 6            | 8.21 | 0.26 | 6         | 1.14 | 0.50 | 7.07 [6.62; 7.52]        |
| Moshtaghion et al 2013      | 8            | 4.80 | 0.13 | 8         | 0.85 | 0.13 | 3.95 [3.82; 4.08]        |
| <b>Random effects model</b> | <b>24</b>    |      |      | <b>24</b> |      |      | <b>3.85 [0.17; 7.54]</b> |

$I^2=100\%$ ,  $\tau^2=10.57$ ,  $p=0$   
 Test for overall effect:  $p=0.04$

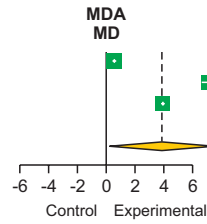

**Supplement Fig. 1.** Forest plot for MD of the MDA in animals with varicocele compared to controls. SD: standard deviation, MD: mean difference, MDA: malondialdehyde.

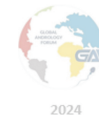

Supplement: wjmh-42-563-s002.pdf [file wjmh-42-563-s002.pdf]
