# Supplementary material for: Impact of Varicocele on Testicular Oxidative Stress and Sperm Parameters in Experimental Animals: A Systematic Review and Meta-Analysis
Source: PubMed Central journal article supplement — World J Mens Health. 2024 Feb 7;42(3):563–73. doi: 10.5534/wjmh.230260 (PMC11216963; doi:10.5534/wjmh.230260), 2024-02-07

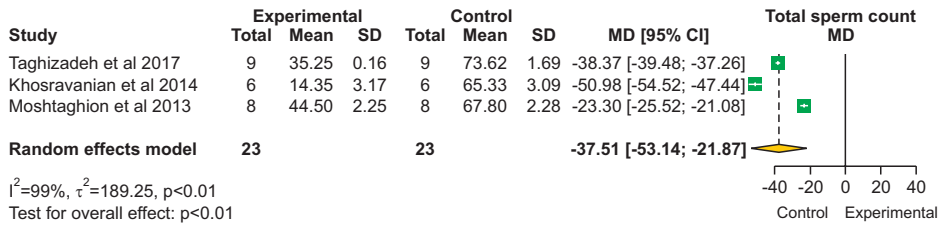

**Supplement Fig. 2.** Forest plot for MD of the TAC in animals with varicocele compared to controls. SD: standard deviation, MD: mean difference, TAC: total antioxidant capacity.

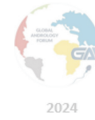

Supplement: wjmh-42-563-s003.pdf [file wjmh-42-563-s003.pdf]
