# Supplementary material for: Impact of Varicocele on Testicular Oxidative Stress and Sperm Parameters in Experimental Animals: A Systematic Review and Meta-Analysis
Source: PubMed Central journal article supplement — World J Mens Health. 2024 Feb 7;42(3):563–73. doi: 10.5534/wjmh.230260 (PMC11216963; doi:10.5534/wjmh.230260), 2024-02-07
Supplement: wjmh-42-563-s006.pdf [file wjmh-42-563-s006.pdf]

**A**

| Study                       | Experimental |       |       | Control   |       |       | MD [95% CI]                 |
|-----------------------------|--------------|-------|-------|-----------|-------|-------|-----------------------------|
|                             | Total        | Mean  | SD    | Total     | Mean  | SD    |                             |
| Sadeghi et al 2020          | 10           | 54.70 | 17.77 | 10        | 42.30 | 20.33 | 12.40 [-4.34; 29.14]        |
| Khosravanian et al 2014     | 6            | 71.00 | 8.41  | 6         | 6.41  | 1.42  | 64.59 [57.77; 71.41]        |
| Moshthagion et al 2013      | 8            | 28.75 | 4.11  | 8         | 6.00  | 3.10  | 22.75 [19.18; 26.32]        |
| Razi et al 2011             | 6            | 35.00 | 2.30  | 6         | 4.20  | 0.83  | 30.80 [28.84; 32.76]        |
| <b>Random effects model</b> | <b>30</b>    |       |       | <b>30</b> |       |       | <b>33.14 [11.23; 55.06]</b> |

$I^2=97%$ ,  $\tau^2=479.27$ ,  $p<0.01$   
Test for overall effect:  $p<0.01$

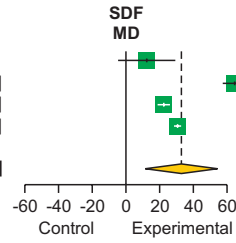

**B**

| Study                            | MD [95% CI]                 | $I^2$      |
|----------------------------------|-----------------------------|------------|
| Omitting Sadeghi et al 2020      | 39.22 [14.27; 64.16]        | 98%        |
| Omitting Khosravanian et al 2014 | 24.53 [16.05; 33.01]        | 89%        |
| Omitting Moshthagion et al 2013  | 36.57 [6.93; 66.20]         | 98%        |
| Omitting Razi et al 2011         | 33.74 [2.44; 65.03]         | 98%        |
| <b>Random effects model</b>      | <b>33.14 [11.23; 55.06]</b> | <b>97%</b> |

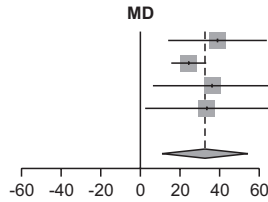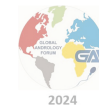

**Supplement Fig. 5.** (A) Forest plot for MD of the SDF in animals with varicocele compared to controls. (B) Sensitivity analysis of the SDF in animals with varicocele compared to controls. SD: standard deviation, MD: mean difference, SDF: sperm DNA fragmentation.
